# Supplementary material
Source: PubMed Central journal article supplement (PMC3697572)
Supplement: AEM.01160-13_zam999104506so1.pdf [file AEM.01160-13_zam999104506so1.pdf]

## 1 **MATERIALS AND METHODS**

2 **Bacterial strains and culture.** Reference bacterial species in this study are listed in  
3 Table S3. Species are from either the ATCC, or were clinical isolates from the Detroit  
4 Medical Center Microbiology Laboratory; all were confirmed in our laboratory by  
5 sequencing the 16S rRNA gene. DNA was extracted from cells from their original agar  
6 plates, or in some cases after being transferred to Luria-Bertani (LB), Brain-Heart  
7 Infusion (BHI), Rogosa, or Blood agar plates (Difco, Detroit, MI). Cells were stored  
8 suspended in 0.5 ml of 15% glycerol-BHI at -80°C or sterile 13% nonfat dry milk, 0.5%  
9 yeast extract, 15% glycerol.

10 **Subject and sample collection.** The subject was enrolled as part of a study at the  
11 Detroit Medical Center (Detroit, MI). The protocol was approved by the Institutional  
12 Review Board of Wayne State University. At enrollment, written informed consent was  
13 obtained, and assurance of confidentiality was given.

14 **DNA extraction.** Bacteria were lysed from vaginal lavages by adding sodium hydroxide  
15 and sodium dodecyl sulfate to final concentrations of 133 mM and 10% respectively,  
16 followed by vigorous reciprocal shaking at room temperature for 30 m. This lysate was  
17 then extracted with phenol:chloroform:isoamyl alcohol (25:24:1) followed by chloroform  
18 extraction. The DNA was precipitated with an equal volume of 100% isopropanol,  
19 washed once with 70% isopropanol, and dissolved in 100 µl TE (10 mM Tris pH 8, 1  
20 mM EDTA) (1). DNA was stored at -20°C until further use. Control experiments  
21 indicated that this method extracted DNA efficiently (detection of at least 40 cells, range  
22 1 – 40 cells) from Gram-positive, Gram-negative, and acid-fast bacteria, using both  
23 fluorescent DNA and PCR-based assays. DNA was amplified from extracts of reference

24 bacterial species as single colonies, using the above protocol or QuickExtract™ Plant  
25 DNA Extraction Solution (Epicentre, Madison, WI), modified by heating at 65°C for 30  
26 m, 95°C for 1 m.

27 **PCR primers, blockers, and amplification.** Standard PCR was performed on  
28 RoboCycler Gradient 96 (Stratagene, La Jolla, CA) in 10 µL reactions overlaid with 15  
29 µL mineral oil. Real-time PCR was performed using Cepheid SmartCycler (Sunnyvale,  
30 CA) or LightCycler 480 II (Roche Applied Sciences, Indianapolis IN) thermal cyclers in  
31 25 µl or 20 µl reaction, respectively. The reaction consisted of individually optimized  
32 amounts of each primer, 250 µM dNTPs (Invitrogen Corporation, Carlsbad, CA or  
33 GenScript, Piscataway, NJ), 20 mM Tris pH 8.3, 3 – 3.5 mM MgCl<sub>2</sub>, 50 mM KCl, and  
34 *Taq* DNA polymerase, 5 units *Taq* from either GeneChoice (Frederick, MD) or New  
35 England Biolabs (Ipswich, MA), 2.5 units GenScript Green *Taq* (Piscataway, NJ), or 1  
36 unit of glycerol-free *Taq* DNA polymerase from APEX (Genesee Scientific, San Diego  
37 CA) per 100 µl reaction volume, including either 0.073X SYBR Green I Nucleic Acid  
38 Stain (FMC Bio Products, Rockland, ME) or 75 nM SYTO9 (Invitrogen Corporation,  
39 Carlsbad, CA) for qPCR reactions.

40 Primers (Fig. 1, Tables S1 and S2) were designed using BioEdit software (Tom  
41 Hall, Ibis Biosciences, Carlsbad, CA) and the Ribosomal Database Project II, Releases  
42 9 and 10 (RDPII, Michigan State University, East Lansing, MI,  
43 <http://rdp.cme.msu.edu/index.jsp>). Candidate sequences were identified by inspection of  
44 selected aligned sequences and verified for inclusiveness and specificity using Probe  
45 Match on the RDPII website, and for compatibility and lack of internal base pairing using  
46 the tools on the Operon website (<http://www.operon.com/tools/oligo-analysis->

47 [tool.aspx?](#)). PB primer sequences were chosen to include as many species as possible  
48 in the target phylogenetic branch while excluding or minimizing non-targets. Programs  
49 for each primer were optimized for annealing temperature and extension times (Table  
50 S2) on pure templates (genomic DNA or sequenced lavage amplicon) from one or  
51 several species and tested for detection of template from DNA equivalent to at least 1-  
52 10 cells. Primer specificity was then validated using reference species (Table S3) and  
53 ultimately by sequencing of the amplicons they generated from vaginal samples.  
54 Negative controls included mock samples processed at the same time as real samples,  
55 and reactions with no added template. Performance of the broad-spectrum primers was  
56 compared to published sequences and found to be as good to superior in inclusiveness  
57 or sensitivity (Table S1).

58 Lavage DNA was tested for the presence of inhibitors assaying for a shift in Cq  
59 values (Cq = cycle of quantification, the cycle at which product fluorescence is first  
60 detected above background) of a spiked DNA control. The spike DNA was amplified  
61 from a cloned 542 bp fragment of a modified firefly (*Photinus pyralis*) luciferase gene  
62 from pGEM-luc cloned into pGEM-T Easy (both vectors from Promega, Madison, WI)  
63 and amplified with pUC universal (5'-CCCAGTCACGACGTTGTAAAACG) and reverse  
64 (5'-AGCGGATAACAATTTACACAGG) primers with the cycling parameters 1X 1 m @  
65 95°C; 40X (30s 30s 30s @ 94°C 45°C 72°C); 1X 5m @ 72°C. An aliquot of a 10<sup>-6</sup>  
66 dilution of the amplicon was added to each sample for qPCR using luciferase-specific  
67 primers LucF3 (5'- GCTTACTGGGACGAAGACGAA) and LucR3 (5'-  
68 GCGGTTGTTACTTGACTGGC), and amplified using cycling parameters 1X 1 m @  
69 95°C; 40X (30s 30s 30s @ 94°C 64°C 72°C); 1X 5m @ 72°C. Our undiluted lysed

70 lavage gDNAs showed negligible Cq shifts (-0.08 and +0.14, <1 standard deviation from  
71 the mean) compared to spike alone (Cq = 17.68 +/- 0.17 over 14 reactions), indicating  
72 that no inhibitors in the sample influenced the efficiency of the qPCR reactions.

73 Reproducibility of the qPCR reactions was high; for example, among 44 duplicate  
74 reactions, the average Cq range was 0.35, standard deviation 0.25.

75 *Lactobacillus* blocking oligomers (LB-blockers) were designed with the criteria  
76 that they partially overlap binding sites for broad-spectrum BU4F+ / BU6R+ primer  
77 combination (Table S1, S2), and that their melting temperatures (T<sub>m</sub>) were at least  
78 68°C, which are higher than that of BU4F+ / BU6R+. First generation blockers used  
79 phosphorothioate nucleotide on both ends to prevent digestion by exonuclease, and  
80 mismatched bases at the 3' ends were used to prevent their extension by polymerase.  
81 Second generation blockers did not use phosphorothioate nucleotide, but retained the  
82 mismatches and added a 3' phosphate to block extension.

83 **Amplicon cloning.** Broad-spectrum PCR targets were amplified for varying cycle  
84 numbers, typically Cq plus 1 or 2 cycles to achieve a “just visible” product on an  
85 agarose ethidium-bromide gel. Amplicons derived from PB primers were sequenced  
86 directly with the rationale that any species present at 5 to 10-fold over others amplified  
87 by the same PB primer would generate a single, readable sequence; amplicons from  
88 PB primers that were unreadable as uncloned amplicons were cloned after nested PCR.  
89 They were amplified to maximum fluorescence or maximum cycles (typically 40 cycles)  
90 for that primer. Products were cleaned by ultrafiltration with the Montage PCR kit  
91 UFC7PCR50 (Millipore Corporation, Bedford, MA) or QIAquick PCR purification kit  
92 (QIAGEN, Valencia, CA). 1-3 µl of the 20 µl purified product was ligated into pGEM-T

93 Easy vector using the pGEM-T Easy Ligation Kit (Promega, Madison, WI) according to  
94 the manufacturer's specifications. The ligation reaction was carried out 4 hours to  
95 overnight at 4°C. 40 µl of *E. coli* cells (strain XL1-Blue, Stratagene, CA) were  
96 electroporated using a BioRad GenePulser and Pulse Controller (set at 2.5 kV, 25 µFD  
97 capacitance, and 200 Ω resistance) with 1 µl of the ligation, allowed to recover in LB  
98 broth 1 h at 37°C, then plated onto LB agar plus 100 µg/ml ampicillin with 0.1 mM IPTG  
99 and 20 µg/ml X-gal and grown overnight at 37°C. White colonies and a few blue control  
100 colonies were picked from the plates into 100 µl of 15% glycerol or TE, incubated at  
101 95°C for 5 m; 2 µl of this was amplified in 8 µl of reaction buffer as described, using  
102 pUC universal and reverse primers that flank the cloning site in the vector (as described  
103 earlier) except extension times for cloned amplicons from PB primers were adjusted as  
104 appropriate for each amplicon size according to Table S2. An aliquot of each amplicon  
105 was tested by agarose gel electrophoresis.

106 **Sequencing and analysis.** Full length amplicons (5 µl) were enzymatically cleaned  
107 using a 5 µl solution of 0.1 units of NTPhos thermolabile phosphatase and 1 unit of  
108 Exonuclease I (Epicentre Biotechnologies, Madison, WI), in 20 mM Tris pH 8.3, 50 mM  
109 KCl and 10 mM MgCl<sub>2</sub> (1X PCR reaction buffer, Invitrogen Corporation, Carlsbad, CA),  
110 incubated at 37°C for 15 m, then inactivated at 80°C for 15 m, and used for sequencing.

111 Mini-libraries were constructed from amplicons with co-dominant species (which  
112 generate mixed template reads when uncloned); 17 mini-libraries each averaging 11  
113 sequences were sequenced. Enzymatically cleaned amplicons were sequenced with  
114 the same primers used for amplification or T7 for cloned amplicons at Functional  
115 Biosciences, Inc. (<http://www.functionalbio.com/index.htm>). Sequences were uploaded

116 to Ribosomal Database Project II using the Pipeline function in MyRDP  
117 (<https://rdp.cme.msu.edu/login/myrdp/overview.spr>) for trimming, quality scoring,  
118 alignment, and identification. Only base calls with PHRED quality scores (Q) above 20  
119 were considered. A small number of high quality sequences were rejected by the  
120 website as non-ribosomal and were not considered further in this analysis. Aligned  
121 sequences, their closest hits via SeqMatch, and manually selected reference species,  
122 were downloaded from myRDP, manually trimmed to common 5' and 3' ends, and  
123 analyzed with Molecular Evolutionary Genetics Analysis (MEGA4 and MEGA5) software  
124 (2, 3). From this, trees were constructed using the bootstrapped Neighbor-Joining  
125 method (4) or the Maximum Composite Likelihood method (5), and used for species  
126 identification.

127 **Degree of LB-blocking.** In this test, the sample was amplified with broad-spectrum  
128 primers with and without LB-blocker, then assayed for the presence of *Lactobacillus*  
129 amplicon with qPCR with nested *Lactobacillus*-specific primers. *Lactobacillus* amplicon  
130 was not generated if blocked, since the amplicon at a 1:1000 dilution was negative by  
131 nested qPCR with *Lactobacillus* primers. In contrast, unblocked initial reactions  
132 generated product even when diluted one million-fold. The Cq value increased after  
133 blocking by 12 cycles; at its amplification efficiency of 1.85, this indicates that blocking  
134 decreased the effective titer by a factor of at least  $\sim 1.6$  million ( $1000 \times 1.85^{12}$ ).

135 To validate their use, known concentrations of amplicons of 15 vaginal bacterial  
136 species were mixed in proportions that resembled both acute BV and healthy vaginal  
137 samples. PB-qPCR of these mock samples showed that the observed titers agreed with  
138 the input, typically with an observed / input ratio of 0.6 (data not shown).

139 **Calculation of titers and percent compositions.** Cq values from reactions in  
140 LightCycler 480 II Real-Time PCR System (Roche Applied Science, Indianapolis, IN)  
141 were converted to molecules by comparison to Cq values of a standard curve from the  
142 same run derived from four to eight 10-fold serial dilutions of an amplicon quantified  
143 using the Quant-iT assay (Invitrogen, Carlsbad, CA). Molecules per  $\mu\text{l}$  were converted  
144 to cells per 5 ml lavage, assuming an average of 5 ribosomal genes per cell (6) and  
145 proportioned to the ratio of the volume of the lavage used in the DNA prep and the its  
146 final volume.

147         If the titer of the sample was below the limit of detection for the PB assay, nested  
148 PCR on a 24-cycle amplicon from a longer broad-spectrum 16S rRNA gene amplicon  
149 was performed (Fig. 1, Tables S1 and S2). If the nested PCR was negative, the titer of  
150 the original sample was assumed to be 0; if the nested PCR was positive, the titer was  
151 reported as below the concentration of most dilute but still positive sample in each  
152 specific run. Amplicons were sequenced to verify that targeted species were amplified.  
153 Mixed amplicons were cloned into pGEM-T easy (Promega, Madison, WI), and ~10 of  
154 the resultant clones sequenced. Percentages were calculated by dividing the titer from  
155 each PB primer by the sum of the titers from all the PB primers.

156         Compositions determined by 16S-C&S were simply tallies of sequences in each  
157 taxa, defined here as those with >97% identity. These are depicted graphically in Figs. 2  
158 and 3. These tallies were adjusted in libraries from LB-blocked PCR with a correction  
159 factor. To determine this factor, the titers of *Gardnerella* and *Lactobacillus* were  
160 independently determined with and without blocking by PB-qPCR. Their ratio in the  
161 unblocked sample ( $7 \times 10^{-6}$ ) was increased in the blocked sample to 0.09, indicating an

162 enrichment of  $0.09/7 \times 10^{-6} = 12,600$ . To allow for better comparison of qPCR to 16S-  
163 C&S results, we converted percent composition to titers by multiplying the fraction of the  
164 broad spectrum sequences in the targeted taxonomic group by the total number of  
165 bacteria in the sample as determined by summed titers of all PB-qPCR targets. We  
166 justify this summation across different primers by noting that titers for each primer were  
167 determined from concurrent standard curves on target sequences, which normalizes for  
168 differences in primer efficiencies.  
169



170 **SUPPLEMENT S1** Materials and Methods

171 **SUPPLEMENTAL TABLES:**

172 **TABLE S1** Percentage of RDP database entries with perfect complementarity to broad-  
173 spectrum primers used in vaginal studies

174 **TABLE S2** Summary of primers, PCR programs, and *in silico* performance

175 **TABLE S3** Bacterial reference species used in this study and their responses to LB-  
176 blocker

177 **TABLE S4** Richness and diversity parameters

178 **TABLE S5** Summary of titers and compositions using broad-spectrum primers +/- LB-  
179 Blocker and PB-qPCR

180

181 **SUPPLEMENT REFERENCES**

182

183 1. **Sambrook J, Fritsch EF, Maniatis T.** 1989. Molecular cloning: A laboratory  
184 manual. Cold Spring Harbor Laboratory Press, Cold Spring Harbor, N.Y.

185 2. **Kumar S, Nei M, Dudley J, Tamura K.** 2008. MEGA: A biologist-centric  
186 software for evolutionary analysis of DNA and protein sequences. Brief  
187 Bioinform. **9**:299-306.

188 3. **Tamura K, Dudley J, Nei M, Kumar S.** 2007. MEGA4: Molecular Evolutionary  
189 Genetics Analysis (MEGA) software version 4.0. Mol. Biol. Evol. **24**:1596-1599.

190 4. **Saitou N, Nei M.** 1987. The neighbor-joining method: a new method for  
191 reconstructing phylogenetic trees. Mol. Biol. Evol. **4**:406-425.

- 192 5. **Tamura K, Nei M, Kumar S.** 2004. Prospects for inferring very large phylogenies  
193 by using the neighbor-joining method. Proc. Natl. Acad. Sci. U. S. A. **101**:11030-  
194 11035.
- 195 6. **Fogel GB, Collins CR, Li J, Brunk CF.** 1999. Prokaryotic Genome Size and  
196 SSU rDNA Copy Number: Estimation of Microbial Relative Abundance from a  
197 Mixed Population. Microb. Ecol. **38**:93-113.
- 198
- 199
